# Supplementary material for: Geomagnetic navigation algorithm: A novel meta-heuristic algorithm for solving engineering applications
Source: Research Square preprint supplement (doi:10.21203/rs.3.rs-7816397/v1), 2025-11-03
Supplement: Supplementary file 1 [file 25280067faf3b63f6d78fa52.docx]

Highlights

- Bio-inspired by migratory birds, GNA fuses geomagnetic, landmark and turbulence cues.
- Hybrid Cauchy-Gaussian-Lévy perturbation balances exploration and exploitation.
- Outperforms WOA, TOC, PO and others on CEC-2017 across 10-, 30-, 50-D tests.
- Maintains accuracy as dimension rises; 50-D F30 optimum 1/1300 of rivals.
- Delivers lower cost/weight solutions on six real-world engineering design tasks.
